# Supplementary material for: Physiology-Based Pharmacokinetic Study on 18β-Glycyrrhetic Acid Mono-Glucuronide (GAMG) Prior to Glycyrrhizin in Rats
Source: MDPI journal article supplement (doi:10.3390/molecules27144657), 2022-07-21
Supplement: s1 [file s1]

# Physiology-based pharmacokinetic study on 18 $\beta$ -glycyrrhetic acid mono-glucuronide (GAMG) prior to glycyrrhizin in rats

Mengxin Cao <sup>a,b,1</sup>, Jiawei Zuo <sup>a,1</sup>, Jian-Guo Yang <sup>a</sup>, Chenyao Wu <sup>a</sup>, Yongan Yang <sup>c</sup>, Wenjian Tang <sup>a,\*</sup>,  
Lili Zhu <sup>a,\*</sup>

<sup>a</sup> School of Pharmacy, Anhui Province Key Laboratory of Major Autoimmune Diseases, Anhui Medical University, Hefei 230032, China

<sup>b</sup> Huainan Municipal Food and Drug Inspection Center, Huainan 232000, China

<sup>c</sup> Jiangsu Nature Biological Engineering Technology Co., Ltd, Nanjing 210023, China

## Contents

|                                                                                                                                   |           |
|-----------------------------------------------------------------------------------------------------------------------------------|-----------|
| <b>Figure S1</b> Total ion current of product ions for each analyte.....                                                          | <b>S2</b> |
| <b>Figure S2</b> Specific chromatograms of each component in rat plasma. ....                                                     | <b>S3</b> |
| <b>Figure S3</b> Linear relationship between GAMG dose and $C_{\max}$ .....                                                       | <b>S4</b> |
| <b>Figure S4</b> Linear relationship between GAMG dose and $AUC_{0-T}$ .....                                                      | <b>S4</b> |
| <b>Figure S5</b> Average plasma concentration-time curve of each analyte .....                                                    | <b>S5</b> |
| <b>Table S1</b> Dilute reliable quality control samples.....                                                                      | <b>S5</b> |
| <b>Table S2</b> Pharmacokinetic parameters of GAMG after intragastric administration of three<br>dose groups of GAMG in rats..... | <b>S6</b> |
| <b>Table S3</b> Pharmacokinetic parameters of GAMG after intragastric administration of three<br>dose groups of GA in rats.....   | <b>S7</b> |
| <b>Table S4</b> Pharmacokinetic parameters of GAMG after ig two groups of rats.....                                               | <b>S8</b> |
| <b>Table S5</b> Pharmacokinetic parameters of GA after two groups of rats.....                                                    | <b>S8</b> |
| <b>Table S6</b> Concentration distribution results of GAMG and GA in various tissues.....                                         | <b>S9</b> |

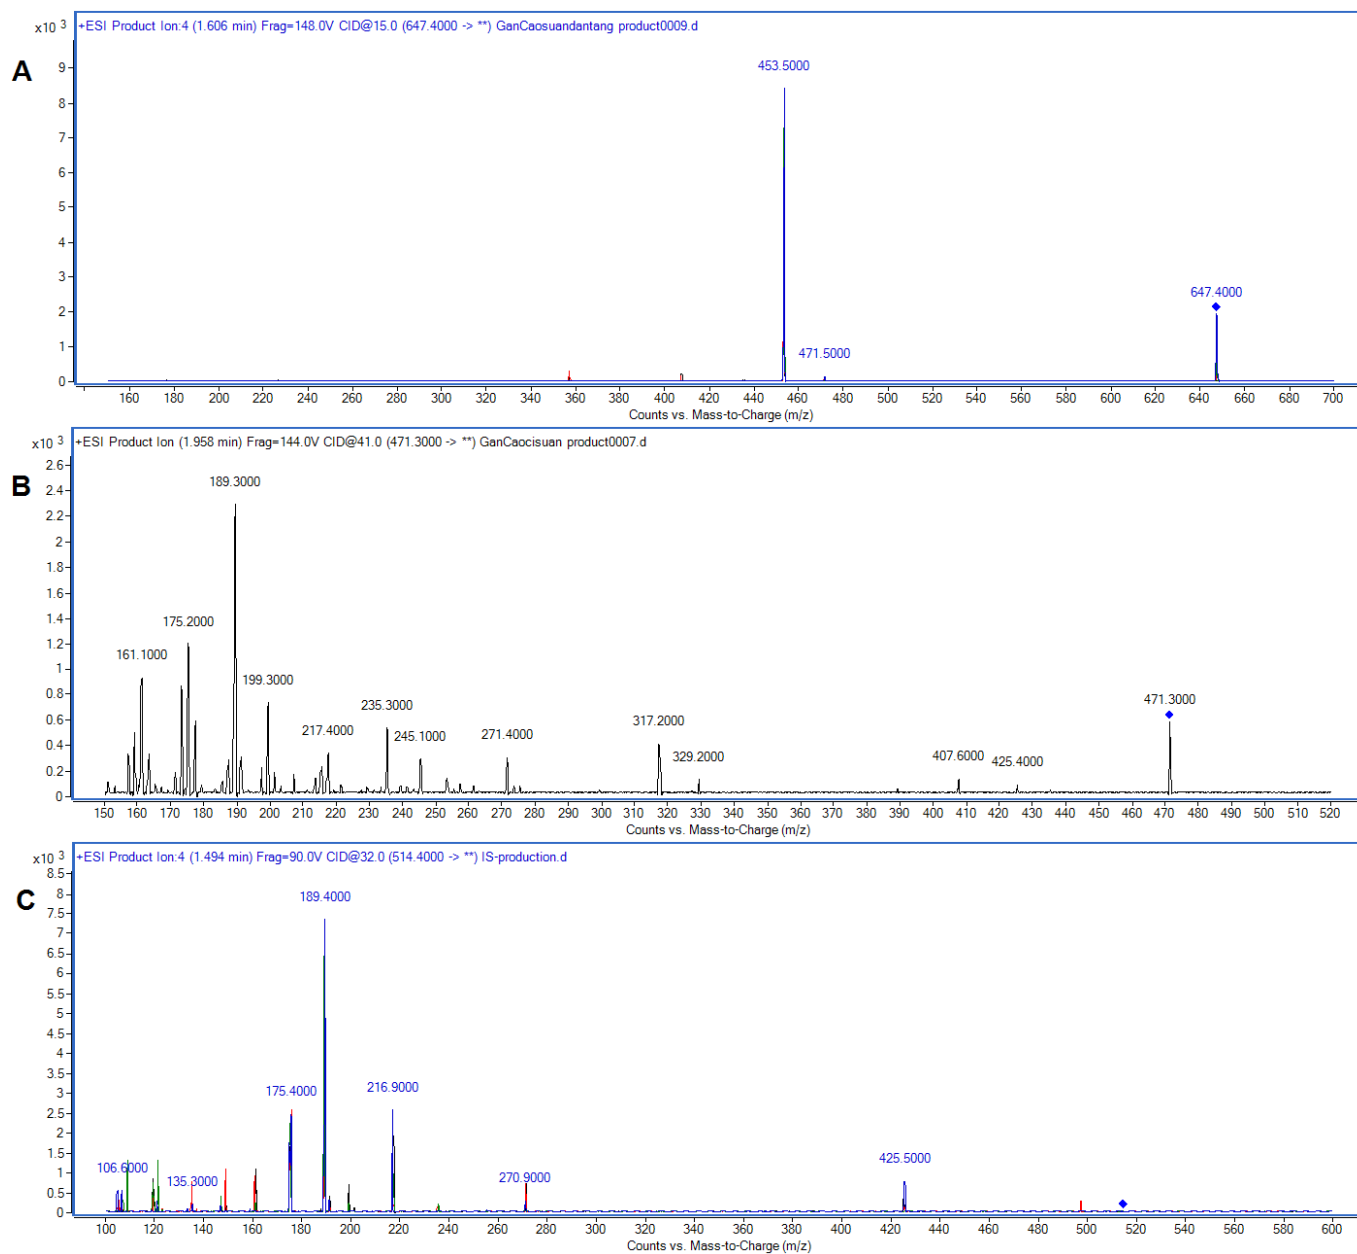

**Figure S1.** Total ion current of product ions for each analyte (A: GAM; B: GA; C: IS).

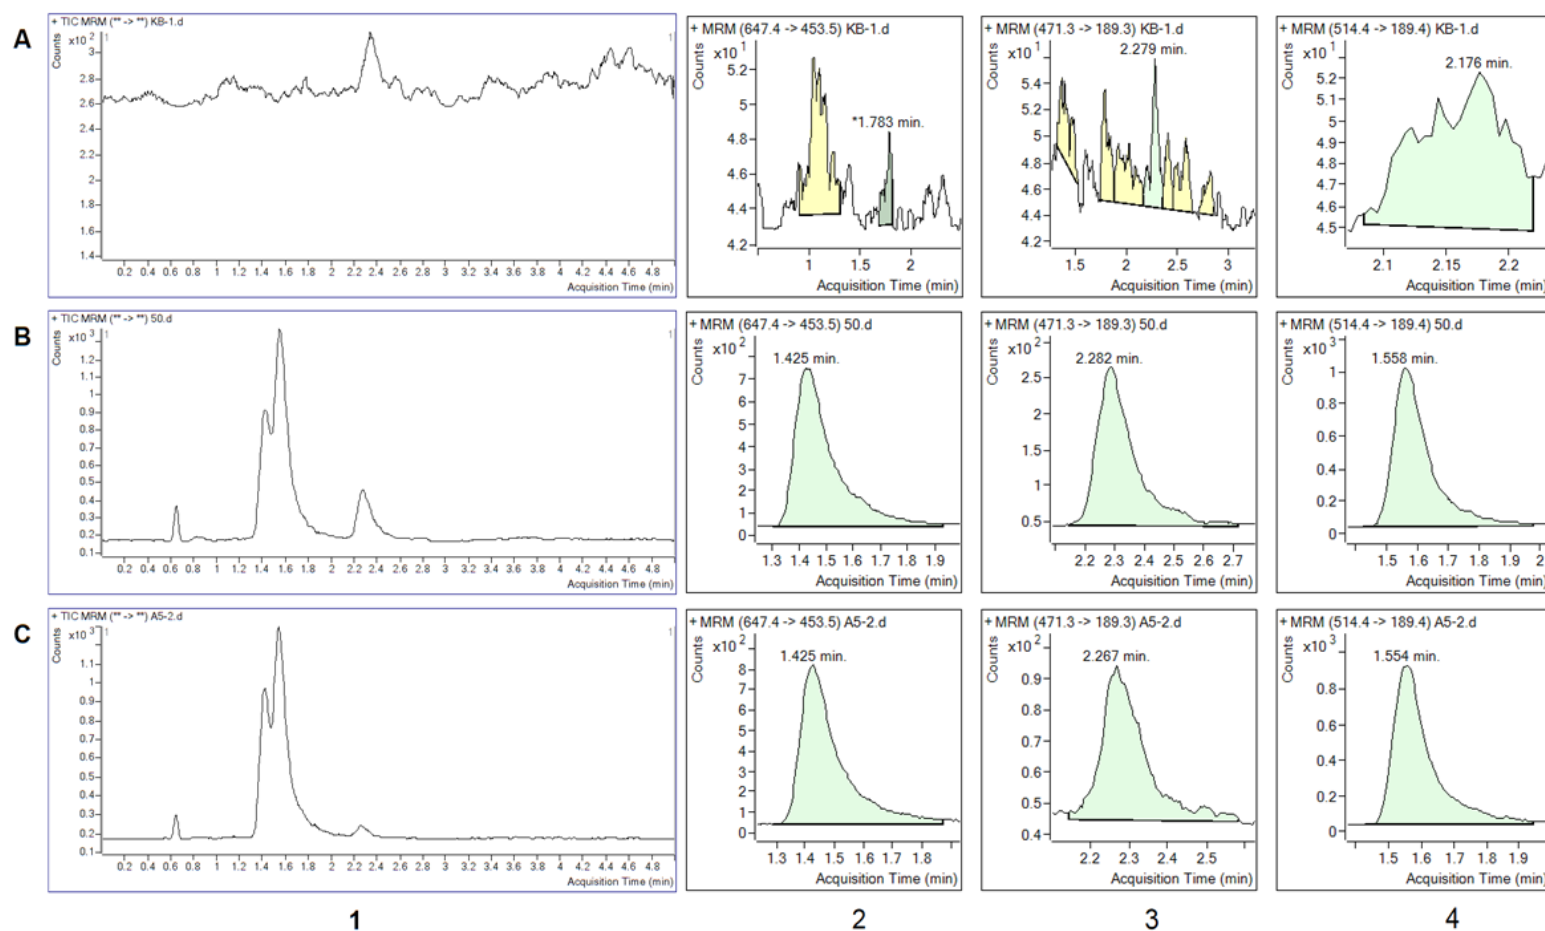

**Figure S2.** Specific chromatograms of each component in rat plasma. **A:** blank plasma sample; **B:** blank rat plasma added of standard references (GAMG 50 ng/mL, GA 50 ng/mL, IS 50 ng/mL); **C:** rat plasma sample obtained 0.25 h after ig 7.5 mg/kg GAMG. (1: Total ion current diagram; 2: GAMG; 3: GA; 4: IS).

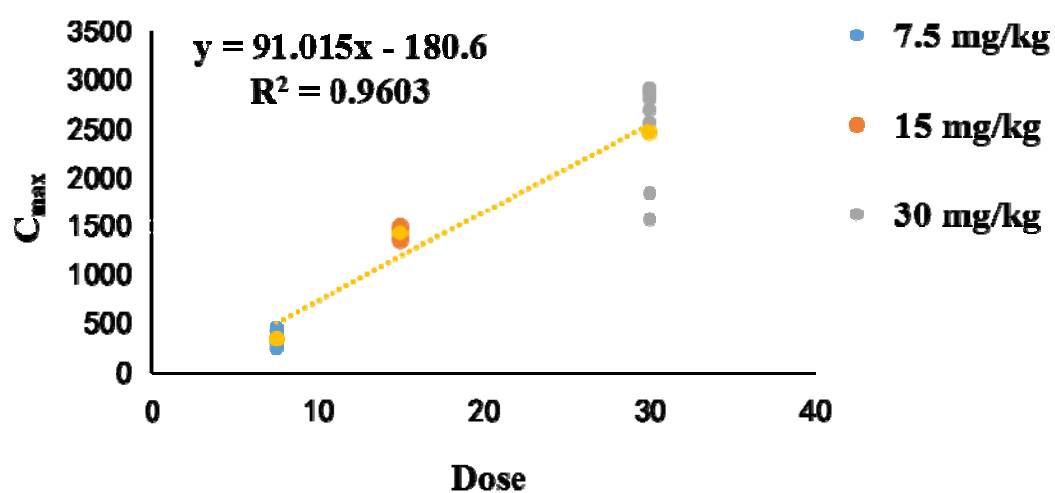

Figure S3. Linear relationship between GAMG dose and  $C_{max}$ .

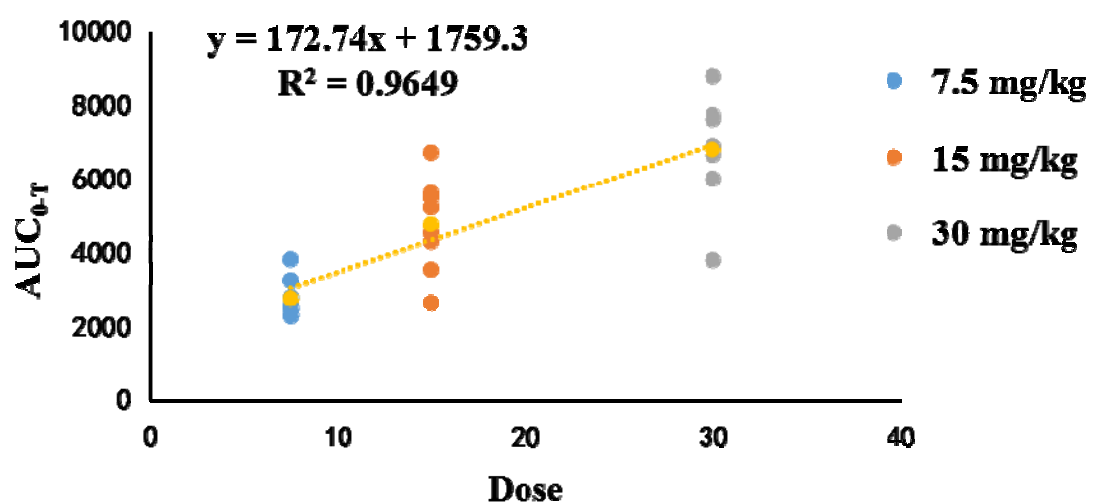

Figure S4. Linear relationship between GAMG dose and  $AUC_{0-T}$ .

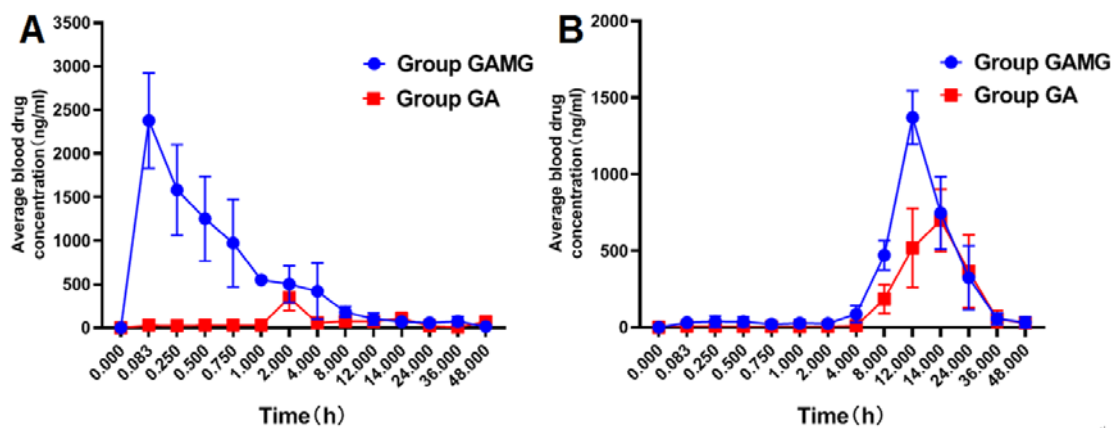

**Figure S5.** Average plasma concentration-time curve of each analyte (A: GAMG; B: GA) after ig two groups of rats (n = 6).

**Table S1** Dilute reliable quality control samples (n = 5)

| Analyte | Theoretical concentration (ng/mL) | Mean measure concentration (ng/mL) | RSD (%) | RE (%) |
|---------|-----------------------------------|------------------------------------|---------|--------|
| GAMG    | 40                                | 40.93                              | 0.85    | 2.08   |
|         | 250                               | 246.71                             | 8.41    | -1.32  |
|         | 2500                              | 2556.96                            | 1.44    | 2.28   |
| GA      | 40                                | 37.25                              | 7.62    | -6.88  |
|         | 250                               | 238.56                             | 3.84    | -4.58  |
|         | 500                               | 538.94                             | 2.65    | 7.89   |

**Table S2** Pharmacokinetic parameters of GAMG after intragastric administration of three dose groups of GAMG in rats.

| Group             | Pharmacokinetic parameters  | Female<br>(n = 4, mean $\pm$ SD) | Male<br>(n = 4, mean $\pm$ SD) | Total<br>(n = 8, mean $\pm$ SD) |
|-------------------|-----------------------------|----------------------------------|--------------------------------|---------------------------------|
| Low dose group    | $C_{\max}$ (ng/mL)          | 336.45 $\pm$ 57.93               | 346.86 $\pm$ 111.70            | 341.65 $\pm$ 82.56              |
|                   | $T_{\max}$ (h)              | 0.083 $\pm$ 0.00                 | 0.083 $\pm$ 0.00               | 0.083 $\pm$ 0.00                |
|                   | $T_{1/2}$ (h)               | 19.73 $\pm$ 4.57                 | 17.38 $\pm$ 7.32               | 18.56 $\pm$ 5.79                |
|                   | AUC <sub>0-T</sub> (mg/L*h) | 2526.84 $\pm$ 211.48             | 3012.39 $\pm$ 665.19           | 2769.61 $\pm$ 525.51            |
|                   | MRT <sub>0-T</sub> (h)      | 17.36 $\pm$ 1.92                 | 15.32 $\pm$ 3.74               | 16.34 $\pm$ 2.96                |
|                   | $V_d$ (mL/kg)               | 92.93 $\pm$ 31.06                | 94.70 $\pm$ 40.13              | 93.82 $\pm$ 33.23               |
|                   | CL (mL/h/kg)                | 2.98 $\pm$ 0.24                  | 2.58 $\pm$ 0.55                | 2.78 $\pm$ 0.45                 |
| Medium dose group | $C_{\max}$ (ng/mL)          | 1416.09 $\pm$ 70.04              | 1434.21 $\pm$ 61.24            | 1425.15 $\pm$ 61.67             |
|                   | $T_{\max}$ (h)              | 0.083 $\pm$ 0.00                 | 0.083 $\pm$ 0.00               | 0.083 $\pm$ 0.00                |
|                   | $T_{1/2}$ (h)               | 15.30 $\pm$ 0.73                 | 16.71 $\pm$ 7.87               | 16.00 $\pm$ 5.23                |
|                   | AUC <sub>0-T</sub> (mg/L*h) | 5610.41 $\pm$ 899.61             | 3945.85 $\pm$ 1103.04          | 4778.13 $\pm$ 1288.38           |
|                   | MRT <sub>0-T</sub> (h)      | 14.65 $\pm$ 5.50                 | 12.31 $\pm$ 2.75               | 13.48 $\pm$ 4.22                |
|                   | $V_d$ (mL/kg)               | 60.58 $\pm$ 12.08                | 142.67 $\pm$ 141.96            | 101.63 $\pm$ 112.96             |
|                   | CL (mL/h/kg)                | 2.73 $\pm$ 0.44                  | 4.05 $\pm$ 1.20                | 3.39 $\pm$ 1.20                 |
| High dose group   | $C_{\max}$ (ng/mL)          | 2454.84 $\pm$ 42.46              | 2484.49 $\pm$ 632.79           | 2469.66 $\pm$ 502.01            |
|                   | $T_{\max}$ (h)              | 0.083 $\pm$ 0.00                 | 0.083 $\pm$ 0.00               | 0.083 $\pm$ 0.00                |
|                   | $T_{1/2}$ (h)               | 12.73 $\pm$ 4.89                 | 16.71 $\pm$ 7.87               | 14.72 $\pm$ 6.43                |
|                   | AUC <sub>0-T</sub> (mg/L*h) | 6769.46 $\pm$ 2133.97            | 6828.23 $\pm$ 713.66           | 6798.84 $\pm$ 1473.40           |
|                   | MRT <sub>0-T</sub> (h)      | 11.85 $\pm$ 3.06                 | 12.31 $\pm$ 2.75               | 12.08 $\pm$ 2.70                |
|                   | $V_d$ (mL/kg)               | 73.96 $\pm$ 33.08                | 109.72 $\pm$ 61.99             | 91.84 $\pm$ 49.81               |
|                   | CL (mL/h/kg)                | 4.90 $\pm$ 2.04                  | 4.43 $\pm$ 0.46                | 4.67 $\pm$ 1.39                 |

**Table S3** Pharmacokinetic parameters of GAMG after intragastric administration of three dose groups of GA in rats.

| Group             | Pharmacokinetic parameters | Female<br>(n = 4, mean $\pm$ SD) | Male<br>(n = 4, mean $\pm$ SD) | Total<br>(n = 8, mean $\pm$ SD) |
|-------------------|----------------------------|----------------------------------|--------------------------------|---------------------------------|
| Low dose group    | $C_{\max}$ (ng/mL)         | 352.45 $\pm$ 121.84              | 384.61 $\pm$ 91.70             | 368.53 $\pm$ 101.30             |
|                   | $T_{\max}$ (h)             | 10.00 $\pm$ 2.31                 | 10.50 $\pm$ 3.00               | 10.25 $\pm$ 2.49                |
|                   | $T_{1/2}$ (h)              | 6.10 $\pm$ 2.25                  | 7.00 $\pm$ 1.96                | 6.54 $\pm$ 2.01                 |
|                   | $AUC_{0-T}$ (mg/L*h)       | 3951.21 $\pm$ 956.06             | 4327.73 $\pm$ 1012.36          | 4139.47 $\pm$ 933.53            |
|                   | $MRT_{0-T}$ (h)            | 15.38 $\pm$ 2.54                 | 16.40 $\pm$ 1.06               | 15.89 $\pm$ 1.88                |
|                   | $V_d$ (mL/kg)              | 71.01 $\pm$ 37.22                | 77.13 $\pm$ 43.77              | 74.07 $\pm$ 37.76               |
|                   | CL (mL/h/kg)               | 7.94 $\pm$ 1.90                  | 7.27 $\pm$ 1.92                | 7.60 $\pm$ 1.80                 |
| Medium dose group | $C_{\max}$ (ng/mL)         | 688.87 $\pm$ 90.18               | 784.98 $\pm$ 115.60            | 736.93 $\pm$ 107.06             |
|                   | $T_{\max}$ (h)             | 10.00 $\pm$ 2.31                 | 12.00 $\pm$ 0.00               | 11.00 $\pm$ 1.85                |
|                   | $T_{1/2}$ (h)              | 6.92 $\pm$ 1.04                  | 6.72 $\pm$ 0.86                | 6.82 $\pm$ 0.89                 |
|                   | $AUC_{0-T}$ (mg/L*h)       | 7637.86 $\pm$ 1172.14            | 6342.56 $\pm$ 1094.78          | 6990.21 $\pm$ 1257.71           |
|                   | $MRT_{0-T}$ (h)            | 13.58 $\pm$ 0.96                 | 13.80 $\pm$ 0.69               | 13.69 $\pm$ 0.78                |
|                   | $V_d$ (mL/kg)              | 40.53 $\pm$ 12.22                | 46.77 $\pm$ 3.14               | 43.65 $\pm$ 8.90                |
|                   | CL (mL/h/kg)               | 4.00 $\pm$ 0.65                  | 4.84 $\pm$ 0.62                | 4.42 $\pm$ 0.82                 |
| High dose group   | $C_{\max}$ (ng/mL)         | 1403.44 $\pm$ 98.14              | 1453.97 $\pm$ 59.30            | 1428.70 $\pm$ 79.78             |
|                   | $T_{\max}$ (h)             | 12.50 $\pm$ 1.00                 | 12.00 $\pm$ 0.00               | 12.25 $\pm$ 0.71                |
|                   | $T_{1/2}$ (h)              | 10.23 $\pm$ 5.43                 | 5.36 $\pm$ 0.54                | 7.79 $\pm$ 4.42                 |
|                   | $AUC_{0-T}$ (mg/L*h)       | 14463.37 $\pm$ 5415.07           | 15789.13 $\pm$ 2952.52         | 15126.25 $\pm$ 4099.42          |
|                   | $MRT_{0-T}$ (h)            | 16.07 $\pm$ 1.23                 | 15.56 $\pm$ 0.72               | 15.82 $\pm$ 0.97                |
|                   | $V_d$ (mL/kg)              | 41.82 $\pm$ 42.73                | 15.22 $\pm$ 4.13               | 28.52 $\pm$ 31.50               |
|                   | CL (mL/h/kg)               | 2.38 $\pm$ 1.13                  | 1.95 $\pm$ 0.36                | 2.17 $\pm$ 0.81                 |

**Table S4** Pharmacokinetic parameters of GAMG after ig for two groups of rats (n = 6)

| PK parameters               | GL group (n = 6, mean $\pm$ SD) | GAMG group (n = 6, mean $\pm$ SD) |
|-----------------------------|---------------------------------|-----------------------------------|
| $C_{\max}$ (ng/mL)          | 346.03 $\pm$ 145.13             | 2377.57 $\pm$ 547.40              |
| $T_{\max}$ (h)              | 2.00 $\pm$ 0.00                 | 0.083 $\pm$ 0.00                  |
| $T_{1/2}$ (h)               | 8.18 $\pm$ 2.48                 | 15.73 $\pm$ 7.26                  |
| AUC <sub>0-T</sub> (mg/L*h) | 459.32 $\pm$ 80.81              | 6625.54 $\pm$ 1680.70             |
| MRT <sub>0-T</sub> (h)      | 17.54 $\pm$ 2.81                | 11.22 $\pm$ 2.58                  |
| $V_d$ (mL/kg)               | 133.15 $\pm$ 41.06              | 99.25 $\pm$ 56.43                 |
| CL (mL/h/kg)                | 11.30 $\pm$ 1.93                | 4.85 $\pm$ 1.59                   |

**Table S5** Pharmacokinetic parameters of GA after two groups of rats (n = 6)

| PK parameters               | GL group (n = 6, mean $\pm$ SD) | GAMG group (n = 6, mean $\pm$ SD) |
|-----------------------------|---------------------------------|-----------------------------------|
| $C_{\max}$ (ng/mL)          | 747.08 $\pm$ 236.85             | 1412.58 $\pm$ 80.83               |
| $T_{\max}$ (h)              | 13.67 $\pm$ 0.82                | 12.33 $\pm$ 0.82                  |
| $T_{1/2}$ (h)               | 7.54 $\pm$ 2.86                 | 8.48 $\pm$ 5.00                   |
| AUC <sub>0-T</sub> (mg/L*h) | 11598.49 $\pm$ 4496.08          | 15252.54 $\pm$ 4661.22            |
| MRT <sub>0-T</sub> (h)      | 18.14 $\pm$ 2.35                | 15.99 $\pm$ 1.07                  |
| $V_d$ (mL/kg)               | 32.06 $\pm$ 15.70               | 32.26 $\pm$ 36.29                 |
| CL (mL/h/kg)                | 3.00 $\pm$ 1.38                 | 2.20 $\pm$ 0.94                   |



**Table S6** Concentration distribution results of GAMG and GA in various tissues (n = 6)

| tissue          | Analyte | Con. (µg/g) |               |               |               |               |
|-----------------|---------|-------------|---------------|---------------|---------------|---------------|
|                 |         | 0           | 0.5 h         | 1 h           | 4 h           | 12 h          |
| heart           | GAMG    | 0           | 0.657 ± 0.231 | 0.135 ± 0.042 | 0.086 ± 0.023 | 0.606 ± 0.278 |
|                 | GA      | 0           | 0.049 ± 0.014 | 0.027 ± 0.004 | 0.086 ± 0.023 | 0.158 ± 0.045 |
| liver           | GAMG    | 0           | 1.946 ± 0.499 | 0.800 ± 0.291 | 0.096 ± 0.046 | 0.245 ± 0.077 |
|                 | GA      | 0           | 0.089 ± 0.013 | 0.054 ± 0.016 | 0.142 ± 0.072 | 0.332 ± 0.060 |
| spleen          | GAMG    | 0           | 3.167 ± 0.765 | 0.386 ± 0.111 | 0.743 ± 0.228 | 0.894 ± 0.130 |
|                 | GA      | 0           | 0.087 ± 0.039 | 0.012 ± 0.008 | 0.018 ± 0.008 | 0.052 ± 0.019 |
| lung            | GAMG    | 0           | 1.035 ± 0.083 | 0.869 ± 0.249 | 0.436 ± 0.139 | 1.942 ± 0.227 |
|                 | GA      | 0           | 0.072 ± 0.018 | 0.027 ± 0.008 | 0.259 ± 0.069 | 0.705 ± 0.134 |
| kidney          | GAMG    | 0           | 3.859 ± 0.537 | 0.867 ± 0.151 | 0.271 ± 0.063 | 1.136 ± 0.153 |
|                 | GA      | 0           | 0.054 ± 0.033 | 0.014 ± 0.005 | 0.193 ± 0.085 | 0.479 ± 0.124 |
| brain           | GAMG    | 0           | 1.012 ± 0.142 | 0.481 ± 0.105 | 0.259 ± 0.099 | 0.288 ± 0.033 |
|                 | GA      | 0           | 0             | 0             | 0             | 0             |
| Small intestine | GAMG    | 0           | 2.509 ± 0.729 | 5.634 ± 0.165 | 0.493 ± 0.181 | 0.164 ± 0.045 |
|                 | GA      | 0           | 0.032 ± 0.029 | 0.108 ± 0.104 | 0.070 ± 0.093 | 0.032 ± 0.023 |
